# Supplementary material for: Robust chiral zirconium alkoxide initiators for the room-temperature stereoselective ring-opening polymerisation of rac-lactide
Source: Royal Society of Chemistry journal article supplement (doi:10.1039/b716304e), 2008-01-01

# Supporting Information

## Robust Chiral Zirconium Alkoxide Initiators for the Room-temperature Stereoselective Ring-opening Polymerisation of *rac*-Lactide

Amanda J. Chmura, David M. Cousins, Matthew G. Davidson, \* Matthew D. Jones, Matthew D. Lunn and Mary F. Mahon

### Representative MALDI-TOF of the PLA prepared in solution.

The authors would like to acknowledge Dr. Mark Wyatt from the EPSRC National Mass spectrometry service for analysis. The PLA samples were ionised using NaI both in PosLin and PosRef modes on a Voyager spectrometer.

Polymer prepared from (*R*-1)<sub>2</sub>Zr(O<sup>*i*</sup>Pr)<sub>2</sub> with added water (entry 11 table 2)

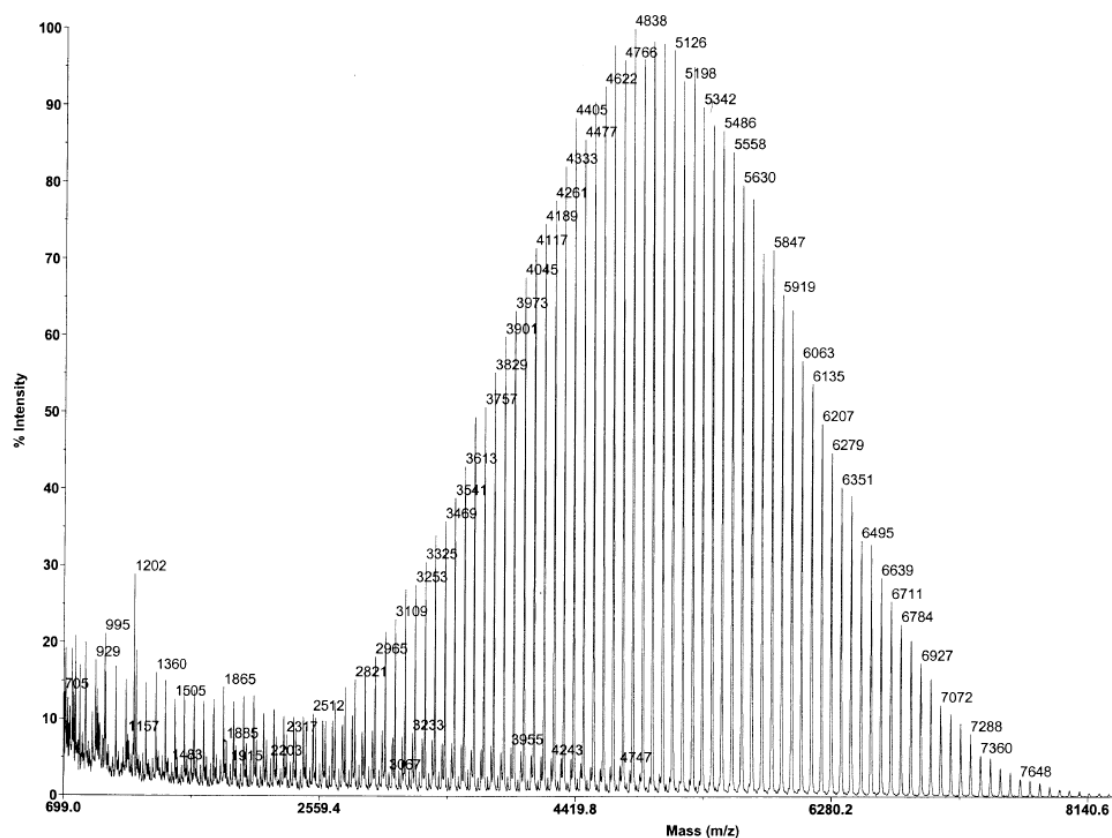

Polymer prepared from  $(R-4)_2\text{Zr}(\text{O}^i\text{Pr})_2$  (entry 6 table 2)

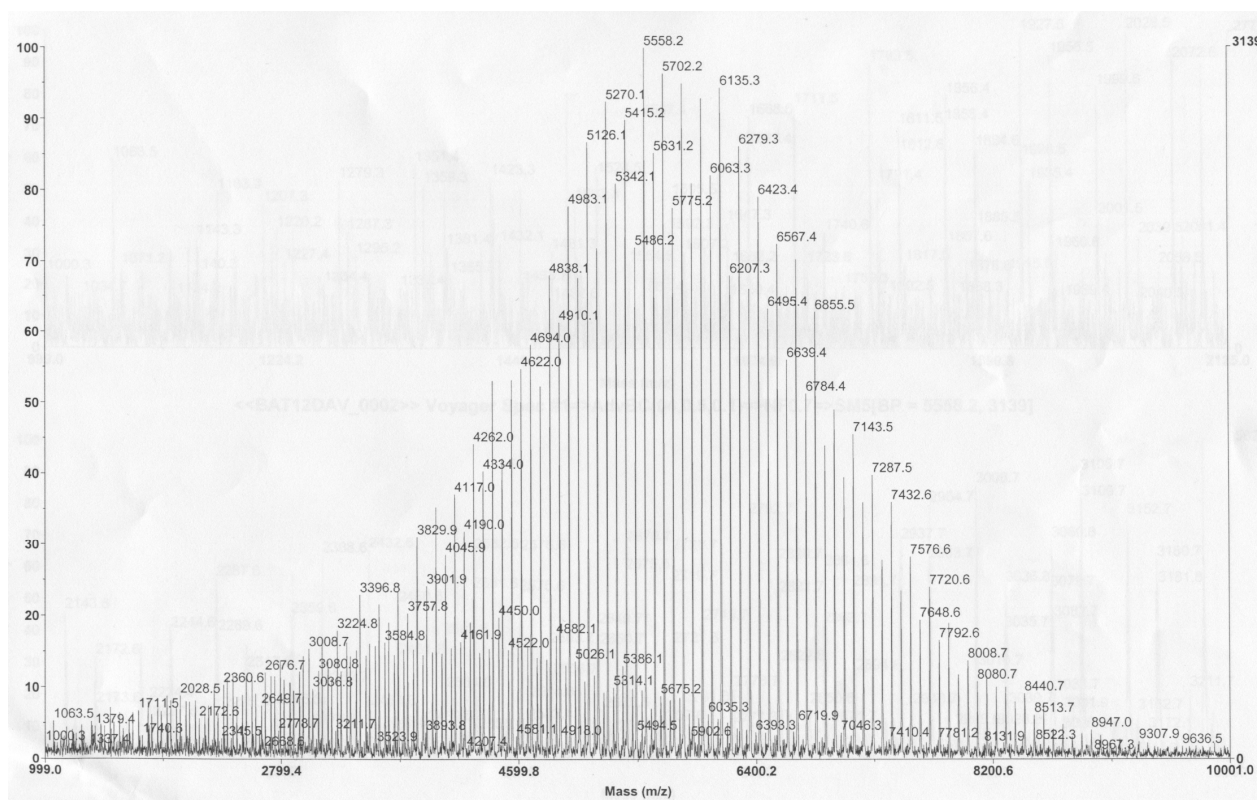

Supplement: b716304e.pdf [file b716304e.pdf]
